# Supplementary material for: RIM-BP3 is a manchette-associated protein essential for spermiogenesis
Source: Oxford University Press journal article supplement (doi:10.1242/dev.030858), 2008-12-18
Supplement: dev030858-sup-030858-tables1.pdf [file dev030858-sup-030858-tables1.pdf]

**Table S1. Fertilized oocytes in timed matings**

| Background | <i>RIM-BP3</i> genotype | Fertilized oocytes (%) |
|------------|-------------------------|------------------------|
| 129sv×ICR  | +/+                     | 92.4 ( <i>n</i> =10)   |
|            | -/-                     | 9.3 ( <i>n</i> =20)    |
| 129sv      | +/+                     | 70.6 ( <i>n</i> =4)    |
|            | -/-                     | 2.0 ( <i>n</i> =11)    |
